# Supplementary material for: A 600 kb deletion syndrome at 16p11.2 leads to energy imbalance and neuropsychiatric disorders
Source: PubMed Central journal article supplement — J Med Genet. 2012 Oct;49(10):660–8. doi: 10.1136/jmedgenet-2012-101203 (PMC3494011; doi:10.1136/jmedgenet-2012-101203), 2012-10
Supplement: jmedgenet-2012-101203-s1.pdf [file jmedgenet-2012-101203-s1.pdf]

**Supplemental online file**

**Zufferey et al,**

**A 600 kb deletion syndrome at 16p11.2 leads to energy imbalance and neuropsychiatric disorders**

## 16p11.2 European Consortium members:

| First name, middle initials | Name         | Institution                                                                                                                                   |
|-----------------------------|--------------|-----------------------------------------------------------------------------------------------------------------------------------------------|
| Sébastien                   | Jacquemont   | Service of Medical Genetics, Centre Hospitalier Universitaire Vaudois / University of Lausanne                                                |
| Marie Claude                | Addor        | Service of Medical Genetics, Centre Hospitalier Universitaire Vaudois, Lausanne                                                               |
| Joris                       | Andrieux     | Institut de Génétique Médicale, Hopital Jeanne de Flandre                                                                                     |
| Benoit                      | Arveiler     | Univ. Bordeaux, Maladies Rares : Génétique et Métabolisme (MRGM), EA4576, Bordeaux / Service de Génétique Médicale, CHU de Bordeaux, Bordeaux |
| Mandy                       | Barker       | Service of Child Psychiatry, SUPEA, Centre Hospitalier Universitaire Vaudois, Lausanne                                                        |
| Noam D.                     | Beckmann     | Service de Génétique, Centre Hospitalier Universitaire Vaudois.                                                                               |
| Marco                       | Belfiore     | Service of Medical Genetics, Centre Hospitalier Universitaire Vaudois, Lausanne                                                               |
| Frédérique                  | Bena         | Service of Genetic Medicine, University Hospitals of Geneva, Geneva                                                                           |
| Laura                       | Bernardini   | Mendel Laboratory, IRCCS Casa Sollievo della Sofferenza Hospital, San Giovanni Rotondo                                                        |
| Patricia                    | Blanchet     | Département de Génétique Médicale, Hopital Arnaud de Villeneuve, CHRU Montpellier                                                             |
| Dominique                   | Bonneau      | Service de génétique médicale, CHU, Anger                                                                                                     |
| Sonia                       | Bouquillon   | Institut de Génétique Médicale, Hopital Jeanne de Flandre                                                                                     |
| Odile                       | Boute        | Hôpital Jeanne de Flandre, CHRU de Lille, Lille                                                                                               |
| Patrick                     | Callier      | Service de Cytogénétique, CHU Le Bocage, Dijon                                                                                                |
| Dominique                   | Campion      | INSERM U614, University of Medicine and Department of Research, Rouvray Psychiatric Hospital, Sotteville-les-Rouen                            |
| Jean                        | Chiesa       | Laboratoire de Cytogénétique, CHU Caremeau, Nimes                                                                                             |
| Philippe                    | Conus        | Department of Psychiatry, Centre Hospitalier Universitaire Vaudois                                                                            |
| Marie Pierre                | Cordier      | Service de génétique, Hôpital Femme Mère Enfant, Lyon                                                                                         |
| Jean Marie                  | Cuisset      | Service de Neuropédiatrie, Hôpital Roger Salengro, CHRU de Lille, Lille                                                                       |
| Albert                      | David        | Service de Génétique Médicale, CHU Nantes, Nantes                                                                                             |
| Nicole                      | de Leeuw     | Department of Human Genetics, Radboud University Nijmegen Medical Centre, Nijmegen                                                            |
| Bert                        | de Vries     | Department of Human Genetics, Radboud University Nijmegen Medical Centre, Nijmegen                                                            |
| Bruno                       | Delobel      | Centre de Génétique Chromosomique, Hopital Saint Vincent                                                                                      |
| Gérard                      | Didelot      | Center for Integrative Genomics, University of Lausanne, Lausanne                                                                             |
| Martine                     | Doco-Fenzy   | Service de Génétique, HMB - CHU REIMS, Reims                                                                                                  |
| Bénédicte                   | Duban Bedu   | Centre de Génétique Chromosomique, Hôpital Saint-Vincent de Paul, GHICL, Lille                                                                |
| Christèle                   | Dubourg      | Laboratoire de Cytogénétique, CHU Rennes, Rennes                                                                                              |
| Sophie                      | Dupuis Girod | Service de Génétique, Hospices Civils de Lyon, Hôpital Louis pradel, Bron                                                                     |
| Christina                   | Fagerberg    | Department of Clinical Genetics Odense Universitetshospital Odense                                                                            |
| Laurence                    | Faivre       | Centre de Référence Maladies Rares “Anomalies du Développement et Syndromes Malformatifs”, Hôpital d'Enfants, CHU Le Bocage, Dijon            |
| Florence                    | Fellmann     | Service of Medical Genetics, Centre Hospitalier Universitaire Vaudois, Lausanne                                                               |

|              |                 |                                                                                                                                        |
|--------------|-----------------|----------------------------------------------------------------------------------------------------------------------------------------|
| Bridget A.   | Fernandez       | Discipline of Genetics, Memorial University of Newfoundland, St John's                                                                 |
| Carina       | Ferrari         | Department of Psychiatry, Centre Hospitalier Universitaire Vaudois                                                                     |
| Richard      | Fisher          | Institute of Human Genetics, International Centre for Life, Newcastle Upon Tyne                                                        |
| Elisabeth    | Flori           | Service de Génétique Médicale, CHU Strasbourg, Hôpital de Hautepierre, Strasbourg                                                      |
| Alice        | Goldenberg      | Service de Génétique, Centre Hospitalier Universitaire de Rouen, Hôpital Charles Nicolle, 76031 Rouen Cedex 1                          |
| Louise       | Harewood        | The Babraham Institute, Cambridge, UK                                                                                                  |
| Delphine     | Heron           | Département de Génétique Cytogénétique et Embryologie AP-HP, Hôpital Pitié-Salpêtrière, Université Pierre et Marie Curie               |
| Loyse        | Hippolyte       | Service of Medical Genetics, Centre Hospitalier Universitaire Vaudois, Lausanne                                                        |
| Murielle     | Holder          | Hopital Jeanne de Flandre, CHRU de Lille, Lille                                                                                        |
| Juliane      | Hoyer           | Institute of Human Genetics, Friedrich-Alexander University Erlangen-Nuremberg, Erlangen                                               |
| Bertrand     | Isidor          | Service de Génétique Médicale, CHU-Nantes, Nantes                                                                                      |
| Sylvie       | Jaillard        | Laboratoire de Cytogénétique, CHU Rennes, Rennes                                                                                       |
| Philippe     | Jonveau         | Laboratoire de Génétique, CHU-Nancy, Vandoeuvre les Nancy                                                                              |
| Sylvie       | Joriot          | Service de pédiatrie, Hôpital Jeanne de Flandres, Lille                                                                                |
| Hubert       | Journel         | Service de Pédiatrie et de Génétique, Centre Hospitalier Bretagne Atlantique, Vannes                                                   |
| Frank        | Kooy            | Department of Medical Genetics, University and University Hospital Antwerp, Antwerp                                                    |
| Zoltán       | Kutalik         | Department of Medical Genetics. University of Lausanne, Lausanne / Swiss Institute of Bioinformatics.                                  |
| Cedric       | Le Caignec      | Service de Génétique Médicale, CHU Nantes, Nantes                                                                                      |
| Sébastien    | Lebon           | Department of Pediatrics, Centre Hospitalier Universitaire Vaudois, Lausanne                                                           |
| Bruno        | Leheup          | Service de Médecine Infantile III et Génétique Clinique, CHU-Nancy et PRES de l'Université de Lorraine UHP Nancy, Vandoeuvre les Nancy |
| Marie-Pierre | Lemaitre        | Service de Neuropédiatrie, Centre Hospitalier Régional Universitaire, Lille                                                            |
| Suzanne      | Lewis           | Department of Medical Genetics. The University of British Columbia, Vancouver                                                          |
| Aurélien     | Macé            | Department of Medical Genetics. University of Lausanne, Lausanne / Swiss Institute of Bioinformatics.                                  |
| Anne M.      | Maillard        | Service of Medical Genetics, Centre Hospitalier Universitaire Vaudois, Lausanne                                                        |
| Valérie      | Malan           | Département de Génétique et INSERM U781, Université Paris Descartes, Hôpital Necker-Enfants Malades, Paris                             |
| Katrin       | Mannik          | Center for Integrative Genomics, University of Lausanne, Institute of Molecular and Cell Biology, University of Tartu, Tartu, Estonia  |
| Danielle     | Martinet        | Service of Medical Genetics, Centre Hospitalier Universitaire Vaudois, Lausanne                                                        |
| Michèle      | Mathieu-Dramard | Service de Génétique Clinique, CHU Amiens, Amiens                                                                                      |
| Andres       | Metspalu        | Estonian Genome Center, University of Tartu, Tartu                                                                                     |
| Fanny        | Morice-Picard   | Service de Génétique Médicale, CHU de Bordeaux, Bordeaux                                                                               |
| Mafalda      | Mucciolo        | Medical Genetics. Dpt. Molecular Biology, University of Siena, Siena                                                                   |

|                     |                    |                                                                                                                                                                             |
|---------------------|--------------------|-----------------------------------------------------------------------------------------------------------------------------------------------------------------------------|
| Eve                 | Oiglane-Slik       | Department of Pediatrics, University of Tartu, Tartu/ Children's Clinic, Tartu University Hospital, Tartu                                                                   |
| Katrin              | Ounap              | Department of Genetics, United Laboratories, Tartu University Hospital, Tartu                                                                                               |
| Laurent             | Pasquier           | Service de Medical Genetics, CHU Rennes, Rennes                                                                                                                             |
| Florence            | Petit              | Hopital Jeanne de Flandre, CHRU de Lille, Lille                                                                                                                             |
| Anne                | Philippe           | Département de Génétique et INSERM U781, Université Paris Descartes, Hôpital Necker-Enfants Malades, Paris                                                                  |
| Ghislaine           | Plessis            | Service de Génétique, CHU Clémenceau, Caen                                                                                                                                  |
| Fabienne            | Prieur             | Service de génétique médicale, CHU St Etienne                                                                                                                               |
| Jacques             | Puechberty         | Département de génétique médicale, Hôpital Arnaud de Villeneuve, Montpellier                                                                                                |
| Evica               | Rajcan-Separovic   | Department of Pathology (Cytogenetics), University of British Columbia, British Columbia                                                                                    |
| Anita               | Rauch              | Institute of Medical Genetics, University of Zurich, Schwerzenbach                                                                                                          |
| Alessandra          | Renieri            | Medical Genetics Unit, Dpt. Molecular Biology, University of Siena, Siena                                                                                                   |
| Claudine            | Rieubland          | Divison of human genetics, Department of Paediatrics, Inselspital, University of Bern                                                                                       |
| Caroline            | Rooryck            | Univ. Bordeaux, Maladies Rares : Génétique et Métabolisme (MRGM), EA4576, Bordeaux / Service de Génétique Médicale, CHU de Bordeaux, Bordeaux                               |
| Katharina Magdalena | Rötzer             | Institute of Human Genetics, Medizinische Universität Graz, Graz                                                                                                            |
| Mariken             | Ruiter             | Department of Human Genetics, Radboud University Nijmegen Medical Centre, Nijmegen                                                                                          |
| Damien              | Sanlaville         | Service de Cytogénétique Constitutionnelle, Hospices Civils de Lyon, CHU de Lyon and Centre de Recherche en Neurosciences de Lyon, UCBL1, U1028 INSERM, UMR 5292 CNRS, Lyon |
| Stéphanie           | Selmoni            | Service of Medical Genetics, Centre Hospitalier Universitaire Vaudois, Lausanne                                                                                             |
| Yiping              | Shen               | Laboratory Medicine, Children's Hospital Boston, Boston                                                                                                                     |
| Vanessa             | Siffredi           | Service of Medical Genetics, Centre Hospitalier Universitaire Vaudois, Lausanne                                                                                             |
| Jacques             | Thonney            | Département de Psychiatrie, Centre Hospitalier Universitaire Vaudois, Lausanne                                                                                              |
| Louis               | Vallée             | Service de Neuropédiatrie, Hôpital Roger Salengro, CHRU de Lille, Lille                                                                                                     |
| Ellen               | van Binsbergen     | Department of Medical Genetics, University Medical Center, Utrecht                                                                                                          |
| Nathalie            | Van der Aa         | Department of Medical Genetics, University and University Hospital Antwerp, Antwerp                                                                                         |
| Mieke               | van Haelst         | Department of Medical Genetics, University Medical Centre Utrecht, Utrecht                                                                                                  |
| Jacqueline          | Vigneron           | Service de Néonatalogie- Génétique, Maternité Régionale Universitaire, Nancy                                                                                                |
| Catherine           | Vincent-Delorme    | Génétique Médicale, Centre Hospitalier d'Arras, Arras                                                                                                                       |
| Disciglio           | Vittoria           | Medical Genetics Unit, Dpt. Molecular Biology, University of Siena, Siena                                                                                                   |
| Anneke              | Vulto-van Silfhout | Department of Human Genetics, Radboud University Nijmegen Medical Centre, Nijmegen                                                                                          |
| Robert M            | Witwicki           | Center for Integrative Genomics, University of Lausanne, Lausanne                                                                                                           |

|            |           |                                                                                                                                          |
|------------|-----------|------------------------------------------------------------------------------------------------------------------------------------------|
| Flore      | Zufferey  | Service of Medical Genetics, Centre Hospitalier Universitaire Vaudois, Lausanne                                                          |
| Simon      | Zwolinski | Institute of Human Genetics, International Centre for Life, Newcastle Upon Tyne                                                          |
| Jacques S. | Beckmann  | Service of Medical Genetics, Centre Hospitalier Universitaire Vaudois, Lausanne / Department of medical genetics, University of Lausanne |
| Alexandre  | Reymond   | Center for Integrative Genomics, University of Lausanne                                                                                  |

**Simons VIP  
consortium  
members**

| <b>First name, middle initials</b> | <b>Name</b>   | <b>Institution</b>                                           |
|------------------------------------|---------------|--------------------------------------------------------------|
| John E.                            | Spiro         | Simons Foundation                                            |
| Arthur L.                          | Beaudet       | Baylor College of Medicine                                   |
| Christie M.                        | Brewton       | Baylor College of Medicine                                   |
| Zili                               | Chu           | Baylor College of Medicine                                   |
| Allison G.                         | Dempsey       | Baylor College of Medicine                                   |
| Yolanda L.                         | Evans         | Baylor College of Medicine                                   |
| Silvia                             | Garza         | Baylor College of Medicine                                   |
| Jill V.                            | Hunter        | Baylor College of Medicine                                   |
| Stephen M.                         | Kanne         | Baylor College of Medicine                                   |
| Anna L.                            | Laakman       | Baylor College of Medicine                                   |
| Morgan W.                          | Lasala        | Baylor College of Medicine                                   |
| Ashlie V.                          | Llorens       | Baylor College of Medicine                                   |
| Gabriela                           | Marzano       | Baylor College of Medicine                                   |
| Timothy J.                         | Moss          | Baylor College of Medicine                                   |
| Kerri P.                           | Nowell        | Baylor College of Medicine                                   |
| Monica B.                          | Proud         | Baylor College of Medicine                                   |
| Melissa B.                         | Ramocki       | Baylor College of Medicine                                   |
| Qixuan                             | Chen          | Mailman School of Public Health, Columbia University         |
| Roger                              | Vaughan       | Columbia University Mailman School of Public Health          |
| Jeffrey                            | Berman        | Department of Radiology, Children's Hospital of Philadelphia |
| Lisa                               | Blaskey       | Children's Hospital of Philadelphia                          |
| Katherine                          | Hines         | Children's Hospital of Philadelphia                          |
| Sudha                              | Kessler       | Children's Hospital of Philadelphia                          |
| Sarah Y.                           | Khan          | Children's Hospital of Philadelphia                          |
| Saba                               | Qasmieh       | Children's Hospital of Philadelphia                          |
| Audrey Lynn                        | Bibb          | Emory Healthcare                                             |
| Andrea M.                          | Paal          | Emory Healthcare                                             |
| Patricia Z.                        | Page          | Department of Human Genetics, Emory University               |
| Bethanny                           | Smith-Packard | Genomic Medicine Institute, Geisinger Clinic                 |
| Randy                              | Buckner       | Children's Hospital Boston, Harvard Medical School           |
| Jordan                             | Burko         | Children's Hospital Boston                                   |
| Alyss                              | Lian          | Children's Hospital Boston                                   |

|              |                  |                                                                                                      |
|--------------|------------------|------------------------------------------------------------------------------------------------------|
|              | Cavanagh         |                                                                                                      |
| Bettina      | Cerban           | Children's Hospital Boston                                                                           |
| Anne V.      | Snow             | Children's Hospital Boston                                                                           |
| P. Ellen     | Grant            | Children's Hospital Boston, Harvard Medical School                                                   |
| LeeAnne      | Green<br>Snyder  | Children's Hospital Boston                                                                           |
| Rebecca      | McNally<br>Keehn | Children's Hospital Boston, Harvard Medical School                                                   |
| David T.     | Miller           | Children's Hospital Boston, Harvard Medical School                                                   |
| Fiona K.     | Miller           | University of Michigan                                                                               |
| Jennifer     | Endre Olson      | Children's Hospital Boston                                                                           |
| Sarah J.     | Spence           | Children's Hospital Boston, Harvard Medical School                                                   |
| Christina    | Triantafallou    | Massachusetts Institute of Technology                                                                |
| Nicole       | Visyak           | Children's Hospital Boston                                                                           |
| Constance    | Atwell           | Simons Foundation                                                                                    |
| Marta        | Benedetti        | Simons Foundation                                                                                    |
| Gerald D.    | Fischbach        | Simons Foundation                                                                                    |
| Marion       | Greenup          | Simons Foundation                                                                                    |
| Alan         | Packer           | Simons Foundation                                                                                    |
| Jennifer     | Tjernagel        | Simons Foundation                                                                                    |
| Polina       | Bukshpun         | Department of Neurology, University of California, San Francisco                                     |
| Maxwell      | Cheong           | Department of Radiology and Biomedical Imaging, University of California, San Francisco              |
| Corby        | Dale             | Department of Radiology and Biomedical Imaging, University of California, San Francisco              |
| Sarah E.     | Gobuty           | Department of Neurology, University of California, San Francisco                                     |
| Leighton     | Hinkley          | Department of Radiology and Biomedical Imaging, University of California, San Francisco              |
| Rita J.      | Jeremy           | CTSI Pediatric Clinical Research Center, University of California, San Francisco                     |
| Hana         | Lee              | Department of Neurology, University of California, San Francisco                                     |
| Tracy L.     | Luks             | Department of Radiology and Biomedical Imaging, University of California, San Francisco              |
| Elysa J.     | Marco            | Department of Neurology, University of California, San Francisco                                     |
| Alastair J.  | Martin           | Department of Radiology and Biomedical Imaging, University of California, San Francisco              |
| Kathleen E.  | McGovern         | Department of Neurology, Brain Development Research Program, University of California, San Francisco |
| Pratik       | Mukherjee        | Department of Radiology and Biomedical Imaging, University of California, San Francisco              |
| Srikantan S. | Nagarajan        | Department of Radiology and Biomedical Imaging, University of California, San Francisco              |
| Julia        | Owen             | Department of Radiology and Biomedical Imaging, University of California, San Francisco              |
| Brianna M.   | Paul             | Department of Neurology, University of California, San Francisco                                     |
| Nicholas J.  | Pojman           | Department of Neurology, University of California, San Francisco                                     |
| Tuhin        | Sinha            | Department of Radiology and Biomedical Imaging, University of California, San Francisco              |
| Vivek        | Swarnakar        | Department of Radiology and Biomedical Imaging, University of California, San Francisco              |
| Mari         | Wakahiro         | Department of Neurology, Brain Development Research Program, University of California, San Francisco |
| Hanalore     | Alupay           | University of Washington, Seattle                                                                    |

|               |             |                                                                                           |
|---------------|-------------|-------------------------------------------------------------------------------------------|
| Benjamin      | Aaronson    | University of Washington, Seattle                                                         |
| Sean          | Ackerman    | University of Washington, Seattle                                                         |
| Katy          | Ankenmann   | University of Washington, Seattle                                                         |
| Elizabeth     | Aylward     | University of Washington, Seattle                                                         |
| Jenna         | Elgin       | University of Washington, Seattle                                                         |
| Jennifer      | Gerds       | University of Washington, Seattle                                                         |
| Kelly         | Johnson     | University of Washington, Seattle                                                         |
| Beau          | Reilly      | University of Washington, Seattle                                                         |
| Dennis        | Shaw        | University of Washington, Seattle                                                         |
| Kyle          | Steinman    | University of Washington, Seattle                                                         |
| Arianne       | Stevens     | University of Washington, Seattle                                                         |
| Tracey        | Ward        | University of Washington, Seattle                                                         |
| Julia         | Wenegrat    | University of Washington, Seattle                                                         |
| Timothy P. L. | Roberts     | The Children's Hospital of Philadelphia and University of Pennsylvania School of Medicine |
| David H.      | Ledbetter   | Genomic Medicine Institute, Geisinger Clinic                                              |
| Christa       | Lese Martin | Department of Human Genetics / Emory University                                           |
| Robin P.      | Goin-Kochel | Baylor College of Medicine                                                                |
| Raphael       | Bernier     | University of Washington, Seattle                                                         |
| W. Andrew     | Faucett     | Genomic Medicine Institute, Geisinger Clinic                                              |
| Elliott H.    | Sherr       | Department of Neurology, University of California, San Francisco                          |
| Ellen         | Hanson      | Children's Hospital Boston, Harvard Medical School                                        |
| Wendy K.      | Chung       | Columbia University                                                                       |

Supplementary data: 16p11.2 clinical paper

Supplementary Table S1: A: Influence of co-variates on FSIQ, BMI, HC and height

|                          | FSIQ      |         | BMI Z-score |                        | HC Z-score |         | Height Z-score    |                        |
|--------------------------|-----------|---------|-------------|------------------------|------------|---------|-------------------|------------------------|
|                          | Mean (n)  | P-value | Mean (n)    | P-value                | Mean (n)   | P-value | Mean (n)          | P-value                |
| Inherited                | 74.0 (14) | 0.1     | 1.8(42)     | 0.7                    | 0.2(36)    | 0.3     | -0.3 (43)         | 0.8                    |
| <i>De novo</i>           | 81.4 (30) |         | 1.6(69)     |                        | 0.6(69)    |         | -0.2 (67)         |                        |
| Male                     | 76.6 (38) | 0.2     | 1.7(116)    | 0.3                    | 0.8(99)    | 0.05    | -0.4 (118)        | 0.9                    |
| Female                   | 71.3 (29) |         | 2.1(84)     |                        | 0.2(56)    |         | -0.4 (78)         |                        |
| Children                 | 76.2 (55) | 0.3     | 1.7(151)    | $1.05 \times 10^{-02}$ | 0.5(138)   | 0.9     | <b>-0.2 (150)</b> | $2.74 \times 10^{-04}$ |
| Adults                   | 70.6 (9)  |         | 2.6 (52)    |                        | 0.6(18)    |         | <b>-1.1 (48)</b>  |                        |
| "Neurological" cases*    | 75.8 (21) | 0.8     | 1.6(50)     | 0.4                    | 0.6(49)    | 0.8     | 0 (51)            | 0.07                   |
| "Non neurological" cases | 76.8 (37) |         | 1.9(139)    |                        | 0.5(97)    |         | -0.5 (133)        |                        |
| Proband                  | 76.1 (59) | 0.8     | 1.8 (186)   | 0.1                    | 0.6 (146)  | 0.6     | -0.3 (182)        | 0.08                   |
| Relatives                | 74.6 (9)  |         | 2.6 (27)    |                        | 0.8 (17)   |         | -0.9 (26)         |                        |
| Total group              | 76.1 (71) | NA      | 1.9(221)    | NA                     | 0.6(170)   | NA      | -0.4 (216)        | NA                     |

**B: Without double hits and point mutations:**

|                          | FSIQ      |         | BMI Z-score |                        | HC Z-score |                        | Height Z-score    |                        |
|--------------------------|-----------|---------|-------------|------------------------|------------|------------------------|-------------------|------------------------|
|                          | Mean (n)  | P-value | Mean (n)    | P-value                | Mean (n)   | P-value                | Mean (n)          | P-value                |
| Inherited                | 74.0 (14) | 0.1     | 1.9(39)     | 0.7                    | 0.3(34)    | 0.5                    | -0.1 (40)         | 0.7                    |
| <i>De novo</i>           | 81.4 (30) |         | 1.7(68)     |                        | 0.5(68)    |                        | -0.2 (66)         |                        |
| Male                     | 76.6 (38) | 0.2     | 1.8(113)    | 0.3                    | 0.8(97)    | $2.66 \times 10^{-02}$ | -0.3 (115)        | 0.7                    |
| Female                   | 71.3 (29) |         | 2.1(83)     |                        | 0.1(55)    |                        | -0.4 (77)         |                        |
| Children                 | 76.2 (55) | 0.3     | 1.7(147)    | $1.38 \times 10^{-02}$ | 0.6(135)   | 0.9                    | <b>-0.1 (146)</b> | $7.73 \times 10^{-05}$ |
| Adults                   | 70.6 (9)  |         | 2.6 (52)    |                        | 0.6(18)    |                        | <b>-1.1 (48)</b>  |                        |
| "Neurological" cases*    | 75.8 (21) | 0.8     | 1.5(49)     | 0.3                    | 0.6(48)    | 0.8                    | 0 (50)            | 0.1                    |
| "Non neurological" cases | 76.8 (37) |         | 1.9(136)    |                        | 0.5(95)    |                        | -0.4 (130)        |                        |
| Proband                  | 76.1 (59) | 0.8     | 1.8 (182)   | $6.22 \times 10^{-02}$ | 0.6 (143)  | 0.8                    | -0.3 (182)        | $1.05 \times 10^{-02}$ |
| Relatives                | 74.6 (9)  |         | 2.7 (26)    |                        | 0.7 (16)   |                        | -0.9 (25)         |                        |
| Total group              | 76.1 (71) | NA      | 2.0(216)    | NA                     | 0.6(166)   | NA                     | -0.4 (211)        | NA                     |

Relatives were excluded when more than one family member was present in the same group. Significant results surviving Bonferroni correction<sup>1</sup> (threshold = 0.01) are shown in bold.

\* A subgroup of patients with significant neurological symptoms was defined by the presence of at least one of the following: seizures (excluding febrile seizures), significant hypotonia and gait, coordination or movement disorders.



**Supplementary Table S2: Neurological features**

| Neurological features                          |                                                                                             | Probands              |                            |                      | Relatives   | All           |
|------------------------------------------------|---------------------------------------------------------------------------------------------|-----------------------|----------------------------|----------------------|-------------|---------------|
|                                                |                                                                                             | Questionnaire<br>N=76 | Full<br>assessment<br>N=54 | Literature<br>N=65*  | N=38        | N=233<br>(%)  |
| <b>Seizures<sup>1</sup></b>                    | Unspecified                                                                                 | 6                     | 9                          | 11                   | 3           | 52<br>(22.3%) |
|                                                | Generalized                                                                                 | 3                     | 7                          | 1                    | 1           |               |
|                                                | Partial                                                                                     | 1                     | 6                          | 1                    | 1           |               |
|                                                | Infantile spasms                                                                            | 2                     | 0                          | 0                    | 0           |               |
| <b>Tone</b>                                    | Spasticity/Hyperreflexia                                                                    | 4                     | 3                          | 1                    | 1           | 38<br>(16.3%) |
|                                                | Hypotonia                                                                                   | 9                     | 6                          | 11                   | 3           |               |
| <b>Gait, coordination, movements disorders</b> | Dysmetria                                                                                   | 1                     | 7                          | 1                    | 0           | 45<br>(19.3%) |
|                                                | Gait disorder/ataxia                                                                        | 5                     | 18                         | 0                    | 1           |               |
|                                                | Paroxysmal movements disorder (chorea, athetosis, tremor)                                   | 1                     | 7                          | 1                    | 3           |               |
| <b>Cranial nerve anomaly</b>                   | Left abducens nerve aplasia                                                                 | 1                     | 1                          | 0                    | 0           | 4<br>(1.7%)   |
|                                                | Unilateral facial palsy                                                                     | 1                     | 1                          | 0                    | 0           |               |
| <b>MRI features</b>                            |                                                                                             | <b>N=24</b>           | <b>N=34</b>                | <b>N= unknown **</b> | <b>N= 7</b> | <b>N=65**</b> |
| <b>CNS anomalies</b>                           | Meningocele/spina bifida occulta                                                            | 2                     | 0                          | 0                    | 0           | 57<br>(87.7%) |
|                                                | Syringomyelia                                                                               | 0                     | 1                          | 2                    | 0           |               |
|                                                | Abnormal corpus callosum/septum pellucidum                                                  | 2                     | 4                          | 2                    | 0           |               |
|                                                | Cerebral atrophy                                                                            | 2                     | 0                          | 1                    | 0           |               |
|                                                | Myelination defect/ unspecific white matter signal changes or decreased white matter volume | 2                     | 4                          | 1                    | 0           |               |
|                                                | Craniocervical junction abnormalities ***                                                   | 1                     | 16                         | 2                    | 3           |               |
|                                                | Abnormal pituitary                                                                          | 0                     | 6                          | 0                    | 1           |               |
|                                                | Abnormal hippocampus                                                                        | 0                     | 3                          | 0                    | 0           |               |
|                                                | Others****                                                                                  | 0                     | 1                          | 1                    | 0           |               |

<sup>1</sup> Febrile seizures (n=7, not shown), \* Cases with available data, \*\* We excluded literature cases from the frequency due to unknown count of MRIs, \*\*\* Platybasia, abnormal angulation of dens, cerebellar tonsillar ectopia (n=9) and Chiari I malformation (n=4), \*\*\*\* Polymicrogyria (n=1), arachnoid cyst with partial left temporal lobe agenesis (n=1).

**Supplementary Table S3: Malformations and other medical conditions**

| Congenital malformations/medical conditions |                                                                                                     | Probands              |                            |                     | Relatives | All           |
|---------------------------------------------|-----------------------------------------------------------------------------------------------------|-----------------------|----------------------------|---------------------|-----------|---------------|
|                                             |                                                                                                     | Questionnaire<br>N=76 | Full<br>assessment<br>N=54 | Literature<br>N=65* | N=38      | N=233<br>(%)  |
| Osteo-<br>articular                         | Hemivertebrae, vertebrae agenesis or fusions, additional, fused rib, Kypho/scoliosis or torticollis | 10                    | 28                         | 4                   | 7         | 59<br>(25.3%) |
|                                             | <i>Talipes varus</i>                                                                                | 1                     | 1                          | 0                   | 0         |               |
|                                             | Craniosynostosis                                                                                    | 0                     | 2                          | 2                   | 1         |               |
|                                             | Limb anomaly**                                                                                      | 1                     | 1                          | 1                   | 0         |               |
| Ophthalmic                                  | Microphthalmia/coloboma/optic nerve hypoplasia/cataract                                             | 4                     | 0                          | 1                   | 0         | 5<br>(2.1%)   |
| Genitalia                                   | Cryptorchidism, Shawl scrotum, Hypospadias, Micropenis,                                             | 6                     | 2                          | 2                   | 0         | 10<br>(4.3%)  |
| Urinary<br>tract                            | Vesico-ureteral reflux/hydronephrosis                                                               | 2                     | 4                          | 0                   | 0         | 8<br>(3.4%)   |
|                                             | Renal agenesis/dysplasia                                                                            | 1                     | 0                          | 1                   | 0         |               |
| Digestive                                   | Hypertrophic pyloric stenosis                                                                       | 4                     | 1                          | 2                   | 1         | 11<br>(4.7%)  |
|                                             | Hirschprung disease                                                                                 | 0                     | 1                          | 1                   | 0         |               |
|                                             | Diaphragmatic hernia                                                                                | 0                     | 0                          | 1                   | 0         |               |
| Cardiac                                     | Structural***                                                                                       | 6                     | 4                          | 3                   | 0         | 14<br>(6.0%)  |
|                                             | Cardiomyopathy****                                                                                  | 1                     | 0                          | 0                   | 0         |               |
| Orofacial                                   | Cleft palate/velopharyngeal insufficiency                                                           | 1/0                   | 2/1                        | 1/0                 | 0         | 8<br>(3.4%)   |
|                                             | Microtia/preauricular tag, cyst                                                                     | 1/2                   | 0                          | 0                   | 0         |               |
| Hearing                                     | Sensorineural/ conductive loss                                                                      | 1/2                   | 1/18                       | 1/1                 | 2         | 26<br>(11.2%) |
| Tumor                                       | Seminoma, cholesteatoma, desmoïd tumor, Wilms tumor                                                 | 2                     | 1                          | 1                   | 0         | 4<br>(1.7%)   |
| Infections                                  | Recurrent pneumonia                                                                                 | 0                     | 4                          | 0                   | 0         | 4<br>(1.7%)   |

\*Cases with available data \*\*Right radius and 1<sup>st</sup> metacarpals agenesis/polydactyly \*\*\*Ventricular/atrial septal defect (VSD/ASD) (n=2), double outlet right ventricle and severe pulmonary stenosis (n=2), supraaortic stenosis/coarctation (n=5), dextrocardia (n=1), tricuspid insufficiency (n=1), endocardial fibroelastosis (n=1), pulmonic stenosis (n=1), \*\*\*\*Hypertrophic.

Conditions seen in a single patient are not present in the table and include: Hashimotos thyroiditis, inflammatory bowel disease, Mullerian agenesis with absent uterus and vaginal atresia, hyperthyroidism and spontaneous pneumothorax. We did not include minor observed medical conditions such as: benign recurrent upper ways infections (n=25) (otitis media, etc.), visual disorders such as strabismus (n=15) and refractive errors (hypermetropia, myopia, astigmatism) (n=37), minor skeletal anomalies (n=10) (pectus excavatum, pes cavus or planus) and gastroesophageal reflux disease (n=20).

**Supplementary Table S4: Neonatal data**

|                                       |                                                           |
|---------------------------------------|-----------------------------------------------------------|
| Mean gestational age                  | 38.8 weeks (n=131 <sup>*</sup> )                          |
| Premature births <sup>**</sup>        | 10.7% (n=14/131)                                          |
| Weight at mean gestational age        | 3048.7 g (n=124; Z-score=-0.61; $p=3.3 \times 10^{-11}$ ) |
| Height at mean gestational age        | 48.9 cm (n=88; Z-score=-0.49; $p=1.3 \times 10^{-3}$ )    |
| HC at mean gestational age            | 33.5 cm (n=58; Z-score=-0.57; $p=2.6 \times 10^{-5}$ )    |
| Neonatal complications <sup>***</sup> | 14.9% (n=29/195)                                          |

<sup>\*</sup> Including literature cases <sup>\*\*</sup> Less than 37 weeks of amenorrhea <sup>\*\*\*</sup> Include: respiratory distress requiring supplemental oxygen/intubation (n=22) and hypotonia (n=7). Z-scores for weight, height and HC at birth were calculated according to gestational ages<sup>2</sup>.

**Supplementary Table S5: Spearman correlations**

|        | HC   |                                          | Height |                                          | Weight |                                          | FSIQ  |         |
|--------|------|------------------------------------------|--------|------------------------------------------|--------|------------------------------------------|-------|---------|
|        | rho  | P-value                                  | rho    | P-value                                  | rho    | P-value                                  | rho   | P-value |
| BMI    | 0.45 | <b><math>2.82 \times 10^{-08}</math></b> | 0.26   | <b><math>4.03 \times 10^{-04}</math></b> | 0.89   | <b><math>1.75 \times 10^{-60}</math></b> | -0.05 | 0.746   |
| HC     |      |                                          | 0.36   | <b><math>1.26 \times 10^{-05}</math></b> | 0.50   | <b><math>1.71 \times 10^{-10}</math></b> | -0.09 | 0.524   |
| Height |      |                                          |        |                                          | 0.51   | <b><math>2.93 \times 10^{-13}</math></b> | -0.13 | 0.350   |
| Weight |      |                                          |        |                                          |        |                                          | -0.09 | 0.517   |

The Spearman correlation values (rho) between FSIQ and anthropometric traits are indicated together with their corresponding P-values. Significant results surviving Bonferroni correction<sup>1</sup> (threshold =  $5 \times 10^{-03}$ ) are shown in bold.

**Supplementary Table S6: Deletion carriers with multiple medical conditions**

| SYSTEMS          | Osteo-articular | Cardio-pulmonary | Ophthalmic | Genital | Urinary tract | Digestive | Face | Sensori-neural* | Tumor | Neuro** |
|------------------|-----------------|------------------|------------|---------|---------------|-----------|------|-----------------|-------|---------|
| Osteo-articular  |                 | 4                | 2          | 3       | 4             | 1         | 0    | 0               | 0     | 3       |
| Cardio-pulmonary | 2               |                  | 1          | 1       | 3             | 1         | 1    | 0               | 1     | 1       |
| Ophthalmic       | 0               | 0                |            | 1       | 1             | 0         | 0    | 1               | 0     | 1       |
| Genital          | 2               | 0                | 0          |         | 1             | 0         | 0    | 1               | 0     | 0       |
| Urinary tract    | 1               | 0                | 0          | 0       |               | 0         | 0    | 0               | 0     | 0       |
| Digestive        | 0               | 0                | 0          | 0       | 0             |           | 0    | 0               | 0     | 1       |
| Face             | 0               | 0                | 0          | 0       | 0             | 0         |      | 0               | 1     | 0       |
| Sensori-neural   | 0               | 0                | 0          | 0       | 0             | 0         | 0    |                 | 0     | 0       |
| Tumor            | 0               | 0                | 0          | 0       | 0             | 0         | 0    | 0               |       | 0       |
| Neuro**          | 0               | 0                | 0          | 0       | 1             | 0         | 0    | 0               | 0     |         |

\*Sensorineural deafness; \*\* Include seizures (excluding febrile seizures), gait, coordination or movements disorders and CNS or medullary malformations

Numbers indicate probands presenting 2 or more major medical conditions (according to Supplementary Table S5) affecting various systems. Probands from the European consortium (n=85) and Simons VIP (n=45) series are represented, respectively, in the upper right and lower left parts. In both series, 76/130 patients (58%) had at

least one malformation or medical problem. Among those, the majority (n=53/76; 70%) had only one. 21% (16/76) had 2, 7.9% (6/76) had 3 and one patient presented 4 (~1%). No recurrent malformation sequence or multisystem involvement is observed.

Supplementary Figure S1: Longitudinal BMI evolution

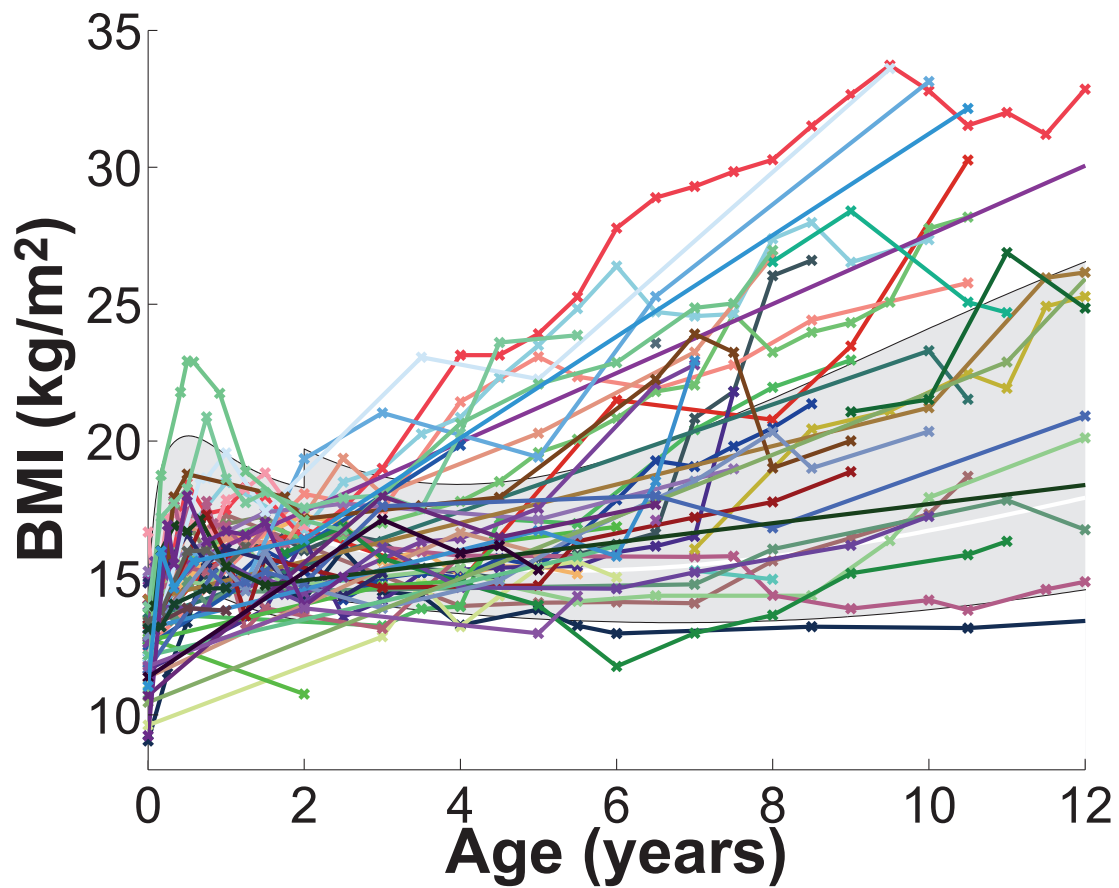

Longitudinal measures of BMI from birth to 12 years of age in 59 carriers of the 16p11.2 BP4-BP5 deletion. Note that BMI acceleration takes place at different ages. The grey area (in background) represents the interval between the 3<sup>rd</sup> and 97<sup>th</sup> percentiles using the WHO data ([www.who.int/childgrowth/en](http://www.who.int/childgrowth/en)) between 0-2 years and the Center for Disease Control data above 2 years<sup>3</sup>. The white line is the 50<sup>th</sup> percentile.

Supplementary Figure S2: Proportion of obese deletion carriers in function of age

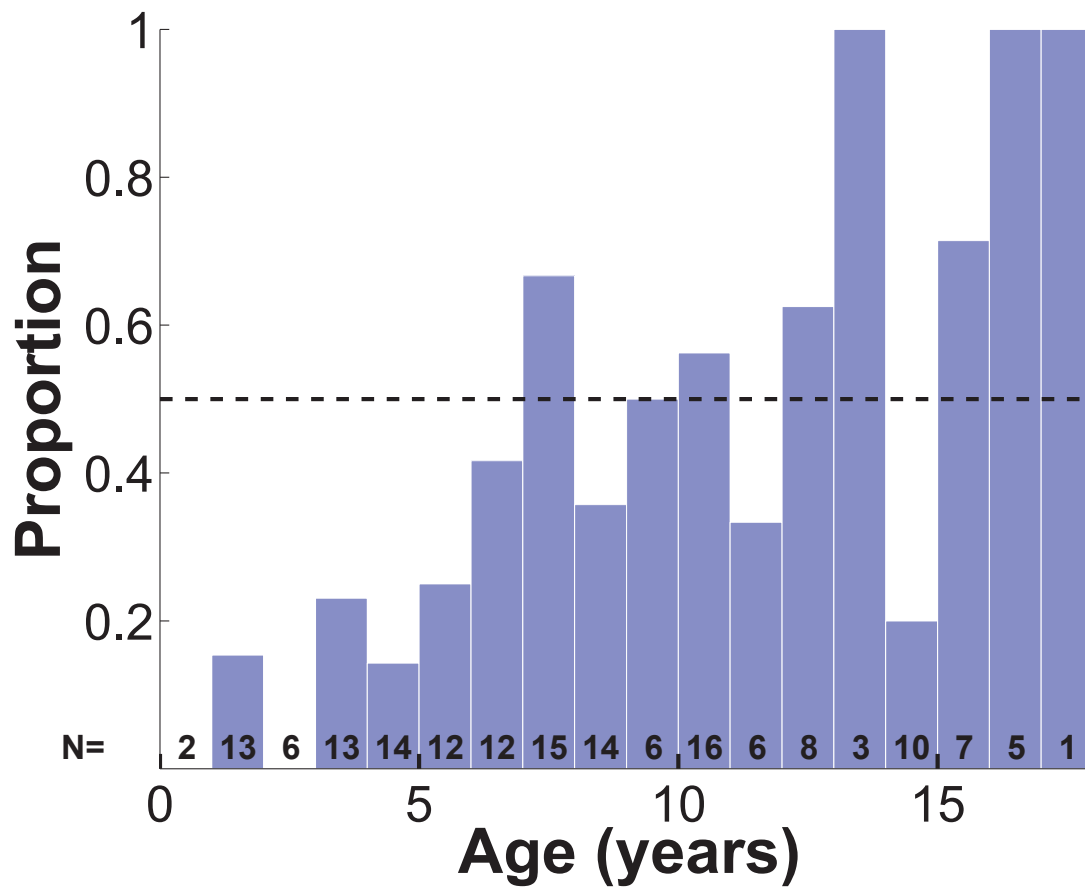

Histogram of cross-sectional data showing the proportion of obese 16p11.2 deletion carriers. Number of cases (N) is indicated for each age category above the x axis. The dashed line, which represents 50%, is reached at 7 years of age.

**Supplementary Figure S3: Distribution of height in obese and non-obese deletion carriers**

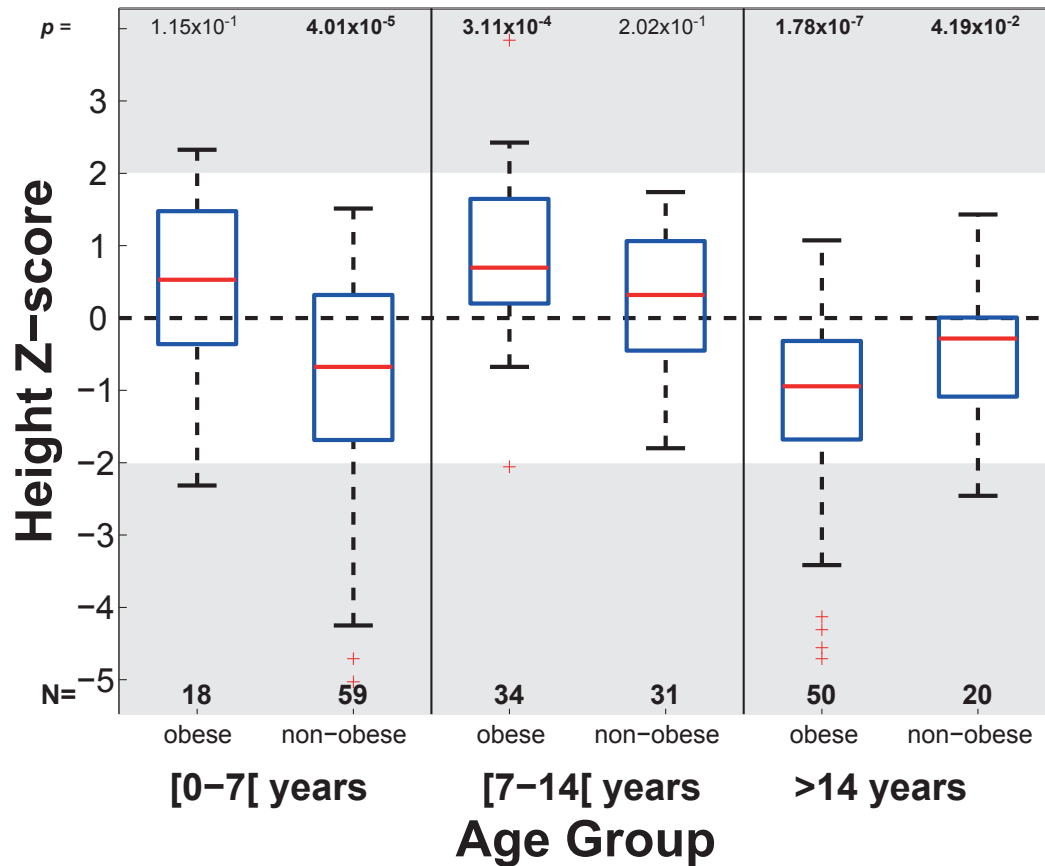

Distribution of cross sectional height Z-scores for 3 age groups. Z-scores, taking into account age and sex, were calculated based on reference population data (cf. methods).

Deletion carriers were stratified as obese, or non-obese. Boxplots represent the 5<sup>th</sup>, 25<sup>th</sup>, median, 75<sup>th</sup> and 95<sup>th</sup> percentile. Grey backgrounds represent  $\pm 2$  Z-scores. Two-sided T-tests were performed probing whether mean Z-score is significantly different from 0 (P-values and sample sizes are shown, respectively above and below the boxplots). We observe that (i) non-obese children are significantly smaller than the general population within the 0-7 years window of development, (ii) obese children are taller than the general population within the 7-14 years window and, (iii) all groups above 14 years are significantly smaller than the general population.

Supplementary Figure S4: Early growth parameters

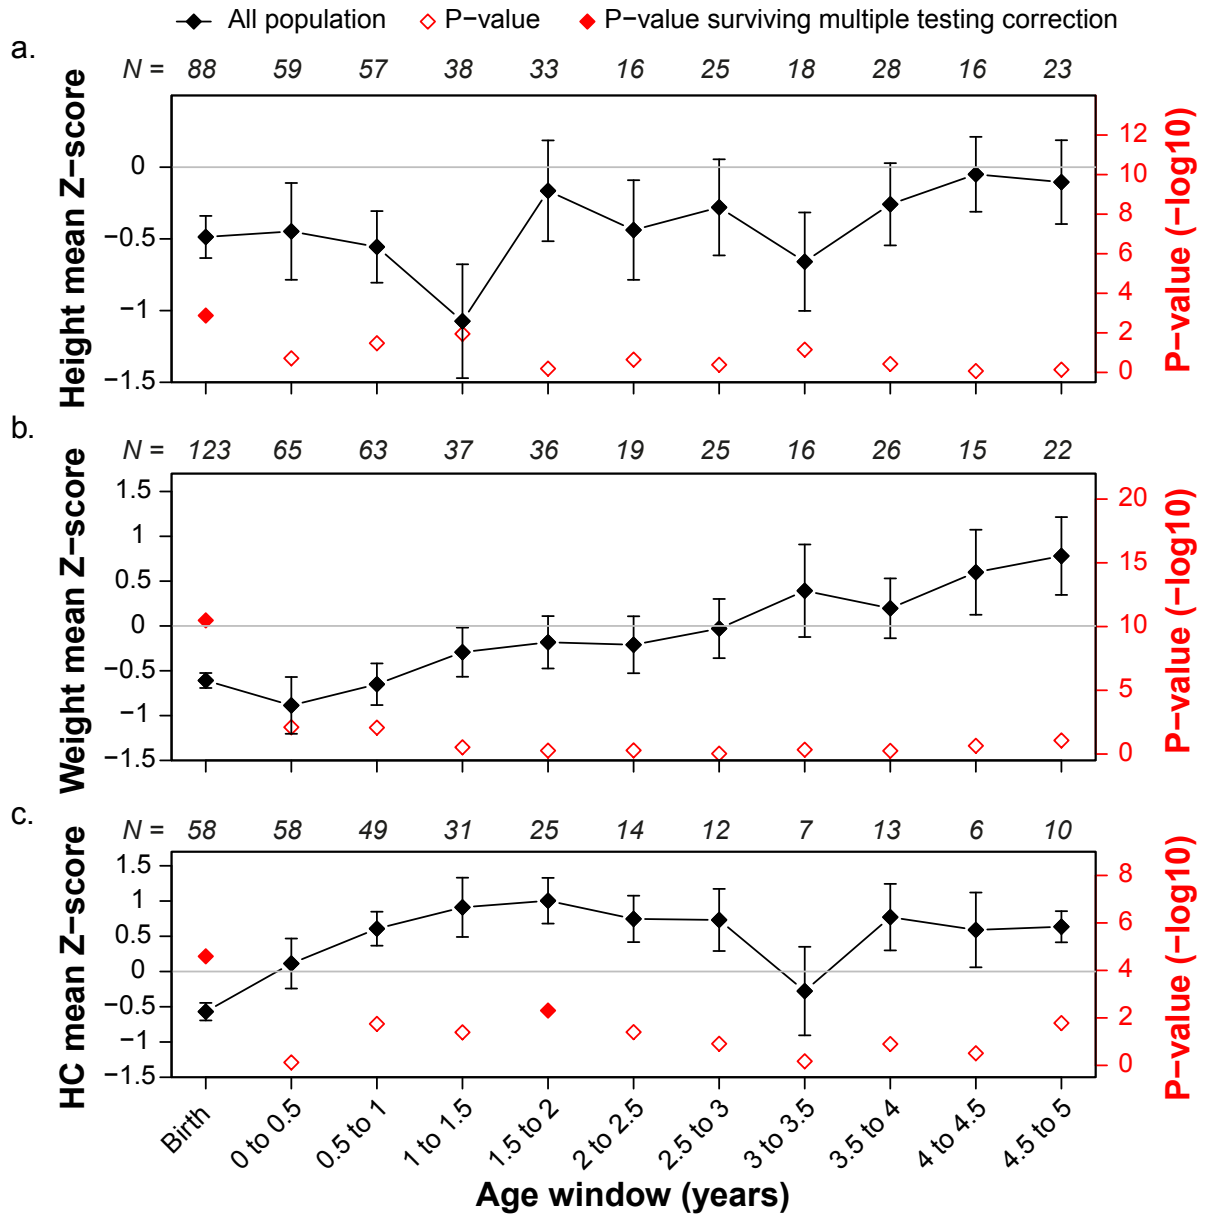

Height (panel a), weight (panel b) and HC (panel c) mean Z-scores and associated P-values as a function of age. Z-scores normalize for the effect of gender and age in the general population (cf methods). Number of cases (N=) is indicated for each age category. A mixed model was used to analyze longitudinal and cross-sectional data together. P-values represent a two-sided T-test. Full red dots are P-values surviving multiple testing correction (significance's threshold at  $5.6 \times 10^{-3}$  for height, at  $5.6 \times 10^{-3}$  for weight and at  $5.0 \times 10^{-3}$  for HC) as opposed to empty red dots. A: HC shows a significant increase during infancy and peaks around the age of 2.25 years. B and C: Height and weight are both significantly decreased at birth



Supplementary Figure S5: Head circumference in the Simon Simplex Collection (SSC)

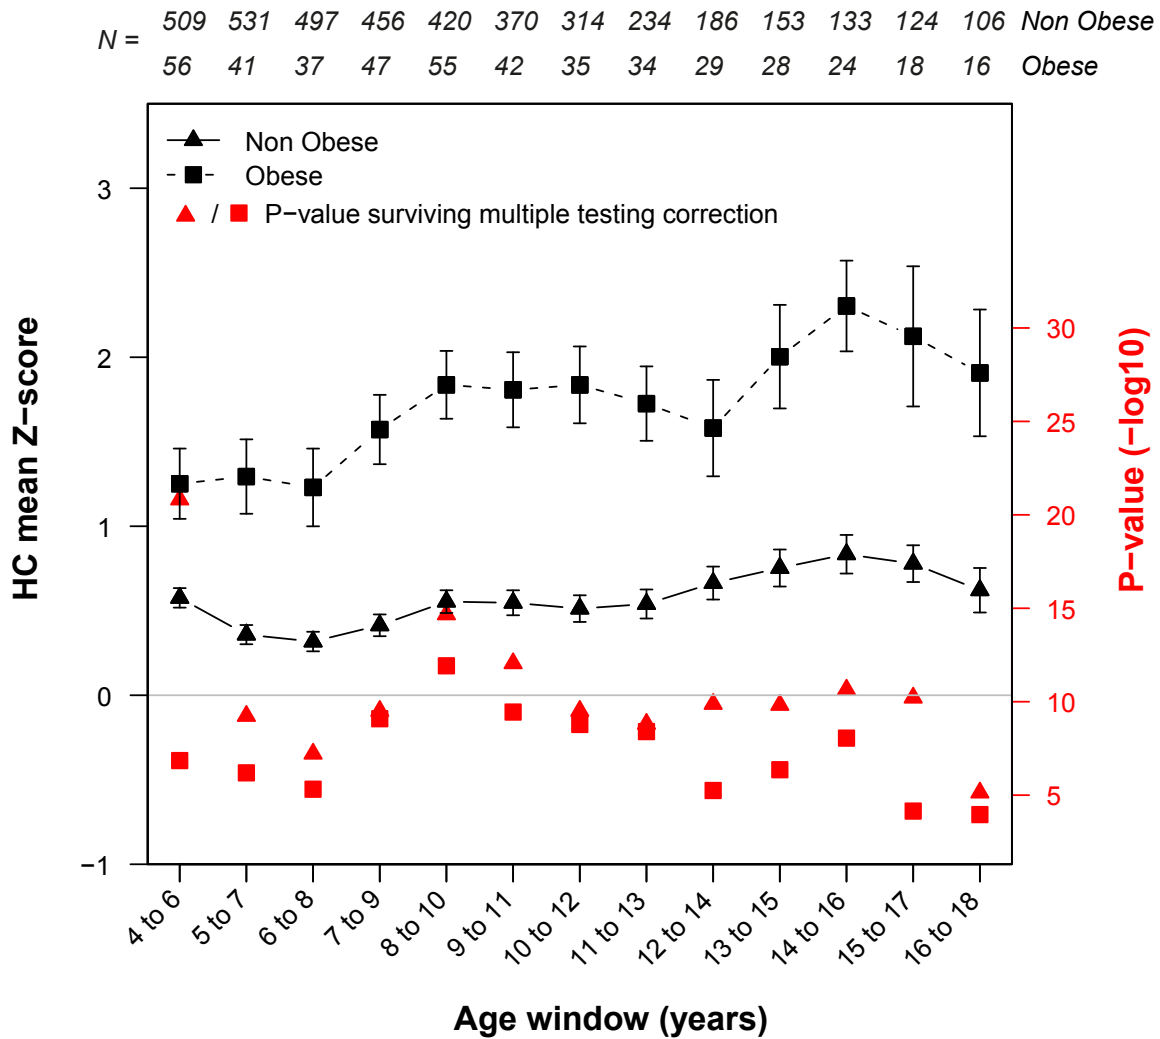

Mean HC Z-scores as a function of age in patients with ASD from the SSC cohort<sup>4</sup>. Obese (n= 252, black squares) and non-obese (n=2166, black triangles) cases are presented separately. Both categories show increased HC throughout childhood and adolescence. P-values surviving multiple testing corrections are shown in red for each age window and both categories (significance's threshold at  $3.9 \times 10^{-3}$  for both obese and non-obese). Number of cases (N=) is indicated for each age category. Macrocephaly (HC  $\geq 2$  Z-scores) is present in 41.3% of obese individuals and 12.5% of non-obese ASD individuals.

### **Supplementary references**

1. Bland JM, Altman DG (1995) Multiple significance tests: the Bonferroni method. *Bmj* 310:170
2. Fenton TR (2003) A new growth chart for preterm babies: Babson and Benda's chart updated with recent data and a new format. *BMC pediatrics* 3:13
3. Kuczumski RJ, Ogden CL, Grummer-Strawn LM, Flegal KM, Guo SS, Wei R, Mei Z, Curtin LR, Roche AF, Johnson CL (2000) CDC growth charts: United States. *Adv Data*:1-27
4. Fischbach GD, Lord C (2010) The Simons Simplex Collection: a resource for identification of autism genetic risk factors. *Neuron* 68:192-195
